# Supplementary material for: Comparative Assessment of Cleaner Production Pathways (Natural and Organic) for Tomato Cultivation: Evaluating Yield, Quality, and Resource Efficiency in Urban Rooftop Systems
Source: Research Square preprint supplement (doi:10.21203/rs.3.rs-8083956/v1), 2025-12-03
Supplement: Supplementary file 1 [file 53ab4572fe57fd6f30e39ec8.docx]

**Table S1. Details of the experiment**

| 1 | Experimental design | Randomized Complete Block Design (RCBD) |
| --- | --- | --- |
| 2 | Number of Treatments | 06 |
| 3 | Number of Replications | 04 |
| 4 | Crop & Variety | Tomato (Virang) |
| 5 | Plant Spacing | 90 cm x 45 cm |
| 6 | Pot Size and Details | 7 plastic pots/ treatment with pot size 25 cm x 22 cm (7 L capacity) |
| 7 | Total No of Pots | 168 pots (28 pots/ treatment) |

**Table S2. Jeevamrut and Vermiwash Fertigation Details**

| Treatment | Jeevamrut/ Vermiwash | Volume of jeevamrut/ vermiwash | Water volume | Application details |
| --- | --- | --- | --- | --- |
| NF1 | Jeevamrut | 560 ml | 5 L | Delivered through drip irrigation using a venturi fitted on the building terrace. |
| NF2 | Jeevamrut | 1120 ml | 5 L |
| OF1 | Vermiwash | 280 ml | 5 L |
| OF2 | Vermiwash | 560 ml | 5 L |

**Table S3. Substrate composition (% by volume)**

| Substrate Content  (% by volume) | Treatments | | | | | |
| --- | --- | --- | --- | --- | --- | --- |
| NF1 | NF2 | OF1 | OF2 | Control | Conventional |
| Soil (%) | 70 | 70 | 70 | 70 | 70 | 70 |
| FYM (%) | 10 | 10 | 10 | 10 | 10 | 10 |
| Vermicompost (%) | 0 | 0 | 5 | 5 | 5 | 5 |
| Ghana jeevamrut (%) | 5 | 5 | 0 | 0 | 0 | 0 |
| Sawdust (%) | 5 | 5 | 5 | 5 | 5 | 5 |
| Crop residue (%) | 10 | 10 | 10 | 10 | 10 | 10 |
| Total (%) | 100 | 100 | 100 | 100 | 100 | 100 |

**Table S4. Details of the chemical properties of the substrate**

| Parameter | Value | Method (Reference) |
| --- | --- | --- |
| Chemical Analysis | | |
| pH | 7.04 | Glass electrode pH meter (Jackson, 1967) |
| EC (ds/ m) | 0.32 | Electrical Conductance Method (Jackson, 1967) |
| Available Nitrogen (kg/ ha) | 309 | Alkaline potassium permanganate method (Subbaiah & Asija, 1956) |
| Available Phosphorus (kg/ ha) | 33.30 | Olsen’s method (Jackson, 1967) |
| Available Potassium (kg/ ha) | 533 | Flame photometer (Jackson, 1967) |
| Organic carbon (%) | 0.74 | Walkley and Black’s method (Jackson, 1967) |

**Table S 5. Jeevamrut and vermiwash application schedule (ml/ plant)**

| Treatment | Days after Planting (DAP) | | | | | | Total/ plant |
| --- | --- | --- | --- | --- | --- | --- | --- |
| Jeevamrut | 10 DAP | 20 DAP | 30 DAP | 40 DAP | 50 DAP | 60 DAP |
| NF1 | 20ml | 20ml | 20ml | 20ml | 20ml | 20ml | 120ml |
| NF2 | - | 40ml | - | 40ml | - | 40ml | 120ml |
| Vermiwash |  |  |  |  |  |  |  |
| OF1 | 10ml | 10ml | 10ml | 10ml | 10ml | 10ml | 60ml |
| OF2 | - | 20ml | - | 20ml | - | 20ml | 60ml |

**Table S 6. Chemical composition of organic formulations**

| Organic Formulations | pH | EC (ds/m) | Total Carbon (%) |
| --- | --- | --- | --- |
| Jeevamrut | 5.32 | 0.32 | 1.00 |
| Vermiwash | 6.8 | 0.25 | 0.08 |

**Table S 7. Macronutrient composition of organic formulations (%)**

| Organic formulations | Total N (%) | Total P (%) | Total K (%) | Total Ca (%) | Total Mg (%) | Total S (%) |
| --- | --- | --- | --- | --- | --- | --- |
| Jeevamrut | 0.16 | 0.072 | 0.22 | 0.002 | 0.004 | 0.004 |
| Vermiwash | 0.18 | 0.024 | 0.30 | 0.003 | 0.001 | 0.002 |

**Table S 8. Micronutrient composition of organic formulations**

| Organic formulations | Total Fe  (mg/kg) | Total Mn  (mg/kg) | Total Zn  (mg/kg) | Total Cu  (mg/kg) |
| --- | --- | --- | --- | --- |
| Jeevamrut | 1334.00 | 77.00 | 255.00 | 39.00 |
| Vermiwash | 0.151 | 213 | 0.132 | 0.117 |
